# Supplementary figures and images for: Simulating transoceanic migrations of young loggerhead sea turtles: merging magnetic navigation behavior with an ocean circulation model
Source: Oxford University Press journal article supplement (doi:10.1242/jeb.067587), 2012-05-09

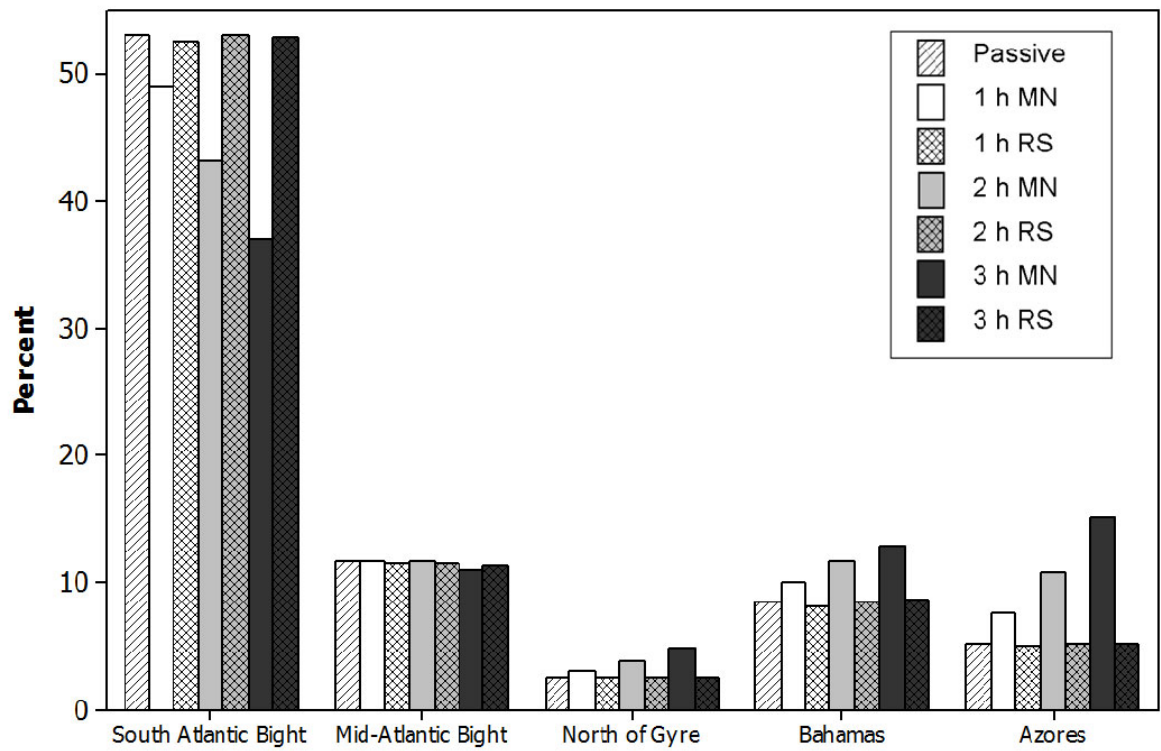

Supplement: jeb067587figs1.pdf [file jeb067587figs1.pdf]
